# Supplementary material for: Clinical Utility of the 12-Gene DCIS Score Assay: Impact on Radiotherapy Recommendations for Patients with Ductal Carcinoma In Situ
Source: Springer Nature journal article supplement (doi:10.1245/s10434-016-5583-7), 2016-10-04
Supplement: MOESM1 [file 10811510]

## **Supplemental Materials**

- **Supplemental Figure 1**
- **Pre-assay Questionnaire**
- **Post-assay Questionnaire**

**Supplemental Figure 1.** Pre- and post-assay estimates of 10-year local recurrence risk made by (a) radiation oncologists and by (b) surgeons, for all patients and patients by DCIS Score risk group. Pre- and post-assay mean (standard deviation) and median (range) estimates are shown in tables alongside graphs. Each line in each graph represents one physician's estimate from pre- to post-assay.

a.

Each line represents one radiation oncologist's recommendation

**All patients (N=127)**

|      |                  |
|------|------------------|
| Pre  | Mean 15.8 (8.6)  |
|      | Median 14 (4-50) |
| Post | Mean 16.3 (8.1)  |
|      | Median 15 (1-50) |

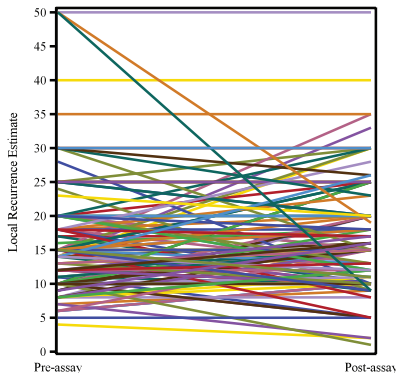

**DCIS Intermediate (n=25)**

|      |                   |
|------|-------------------|
| Pre  | Mean 21.3 (11.4)  |
|      | Median 20 (6-50)  |
| Post | Mean 22.8         |
|      | Median 20 (10-50) |

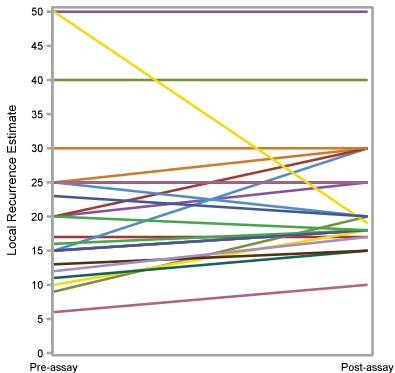

**DCIS Low (n=84)**

|      |                    |
|------|--------------------|
| Pre  | Mean 13.7 (6.9)    |
|      | Median 12 (4-50)   |
| Post | Mean 12.2 (4.8)    |
|      | Median 11.5 (1-35) |

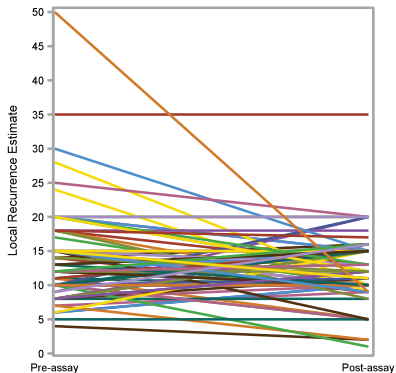

**DCIS High (n=18)**

|      |                   |
|------|-------------------|
| Pre  | Mean 18.3 (7.4)   |
|      | Median 15 (8-30)  |
| Post | Mean 26.1 (4.3)   |
|      | Median 25 (20-35) |

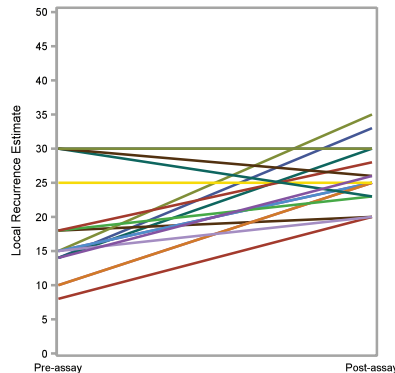

b.

Each line represents one suregon's recommendation

**All patients (N=127)**

|      |                  |
|------|------------------|
| Pre  | Mean 14.7 (7.7)  |
|      | Median 14 (5-40) |
| Post | Mean 14.5 (7.4)  |
|      | Median 14 (0-40) |

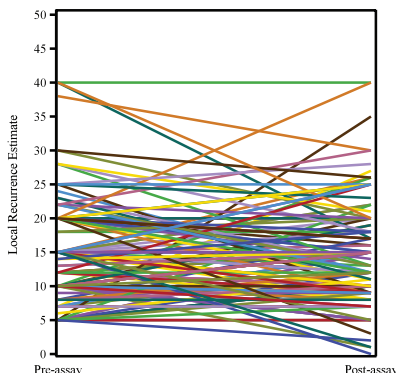

**DCIS Intermediate (n=25)**

|      |                  |
|------|------------------|
| Pre  | Mean 17.3 (9.0)  |
|      | Median 15 (5-40) |
| Post | Mean 19.3 (7.7)  |
|      | Median 19 (7-40) |

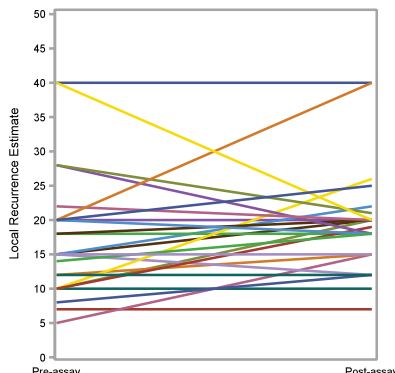

**DCIS Low (n=84)**

|      |                  |
|------|------------------|
| Pre  | Mean 13.3 (6.5)  |
|      | Median 12 (5-40) |
| Post | Mean 11.0 (4.6)  |
|      | Median 10 (0-25) |

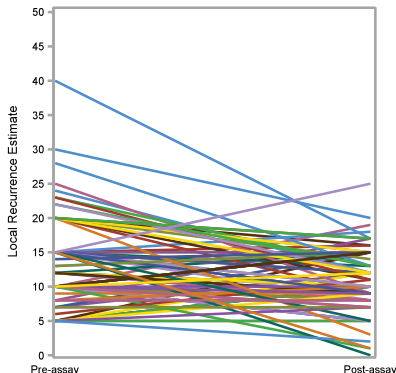

**DCIS High (n=18)**

|      |                    |
|------|--------------------|
| Pre  | Mean 17.6 (9.1)    |
|      | Median 17.5 (5-38) |
| Post | Mean 24.4 (5.0)    |
|      | Median 25 (15-35)  |

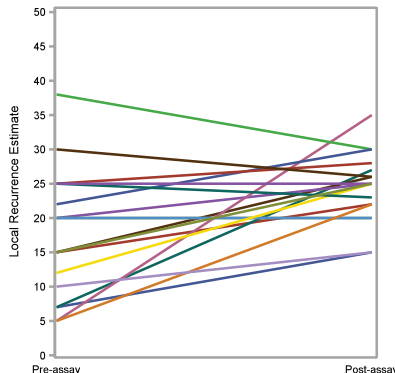

**PRE-DCIS SCORE QUESTIONNAIRE**

**Patient ID Number:**

|  |  |  |  |
|--|--|--|--|
|  |  |  |  |
|--|--|--|--|

**Visit Date:**

|          |          |   |          |          |          |   |          |          |          |          |
|----------|----------|---|----------|----------|----------|---|----------|----------|----------|----------|
|          |          | — |          |          |          | — |          |          |          |          |
| <b>D</b> | <b>D</b> |   | <b>M</b> | <b>M</b> | <b>M</b> |   | <b>Y</b> | <b>Y</b> | <b>Y</b> | <b>Y</b> |

**Physician ID:**

\_\_\_\_\_  
(Physician's **First Initial** combined with their **Last Name** using all lowercase letters. Ex: Dr. John Doe would use jdoe)

**Physician:**     **Surgeon**         **Radiation Oncologist**

**1. What is your estimate of this patient's 10-year risk of local (same breast) recurrence? (Please enter a percentage)**

\_\_\_\_\_ %

**2. Would you recommend radiation treatment for this patient right now?**

- Yes
- No

**3. Please identify up to three of the top reasons for your treatment recommendation**

- Patient age
- Tumor grade
- Tumor size
- Margins
- Comedonecrosis
- Patient preference
- Patient co-morbidities
- Other pathology measures (please specify):

\_\_\_\_\_

- Other reason (please specify):

\_\_\_\_\_

**PHYSICIAN POST-DCIS SCORE QUESTIONNAIRE**

**Patient ID Number:**

**Visit Date:**  —  —   
D D M M M Y Y Y Y

**Physician ID:** \_\_\_\_\_  
(Physician's **First Initial** combined with their **Last Name** using all lowercase letters. Ex: Dr. John Doe would use jdoe)

**Physician:**  **Surgeon**  **Radiation Oncologist**

**Requisition Number:** \_\_\_\_\_

**1. DCIS Score™:** \_\_\_\_\_

**2. What is your estimate of this patient's 10-year risk of local (same breast) recurrence? (Please enter a percentage)**

\_\_\_\_\_ %

**3. Would you recommend radiation treatment for this patient right now?**

- Yes
- No

**4. Please identify up to three of the top reasons for your treatment recommendation**

- Patient age
- Tumor grade
- Tumor size
- Margins
- Comedonecrosis
- Patient preference
- Patient co-morbidities
- Other pathology measures (please specify):  
\_\_\_\_\_

- DCIS Score Result
- Other reason (please specify):  
\_\_\_\_\_

**5. Was the *Oncotype DX* assay useful for this patient?**

- Yes
  - No
- Reason (Why/Why not?):  
\_\_\_\_\_
